# Supplementary material for: A Novel Deep Blue LE-Dominated HLCT Excited State Design Strategy and Material for OLED
Source: MDPI journal article supplement (doi:10.3390/molecules26154560), 2021-07-28
Supplement: s1 [file s1]

## Supporting Information

Article

# A Novel Deep Blue LE-dominated HLCT Excited State Design Strategy and Material for OLED

Xuzhou Tian <sup>1</sup>, Jiayao Sheng <sup>2</sup>, Shi-Tong Zhang <sup>1,\*</sup>, Shengbing Xiao <sup>1</sup>, Ying Gao <sup>1</sup>, Haichao Liu <sup>1</sup> and Bing Yang <sup>1,\*</sup>

<sup>1</sup> State Key Laboratory of Supramolecular Structure and Materials, College of Chemistry, Jilin University, 2699 Qianjin Street, Changchun, 130012, China; tianxz19@mails.jlu.edu.cn (X. Tian); xiaosb20@jlu.edu.cn (S. Xiao); yinggao19@mails.jlu.edu.cn (Y. Gao); hcliu@jlu.edu.cn (H. Liu)

<sup>2</sup> State Key Laboratory of Inorganic Synthesis and Preparative Chemistry, College of Chemistry, Jilin University, 2699 Qianjin Street, Changchun, 130012, China; shengjiyao@jlu.edu.cn (J. Sheng)

\* Correspondence: stzhang@jlu.edu.cn (S. Zhang); yangbing@jlu.edu.cn (B. Yang)

## Contents

S-I Figures

S-II Tables

S-III Illustrations

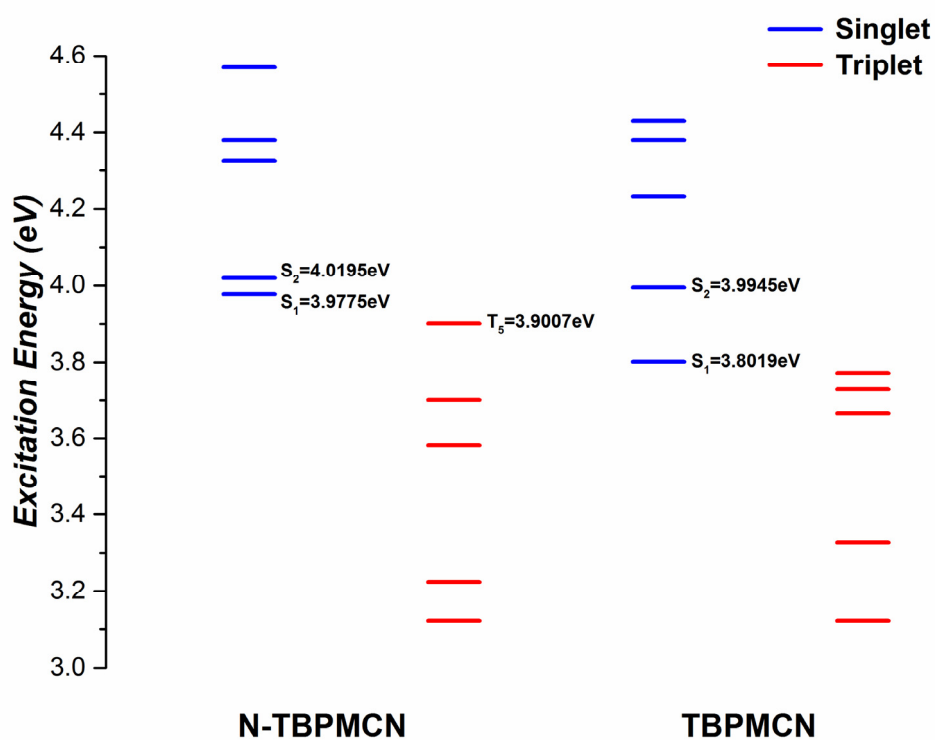

Figure S1. The energy landscape for excited states of N-TBPMCN and TBPMCN.

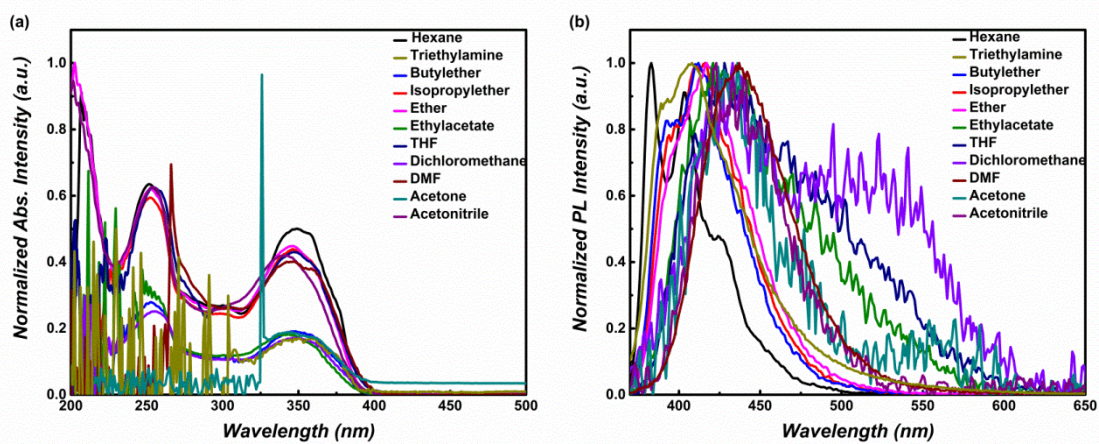

Figure S2. (a) The ultraviolet-visible (UV-Visible) absorption spectra of N-TBPMCN; (b) PL spectra of N-TBPMCN in diluted solutions (concentration =  $1 \times 10^{-5} \text{ mol} \cdot \text{L}^{-1}$ ).

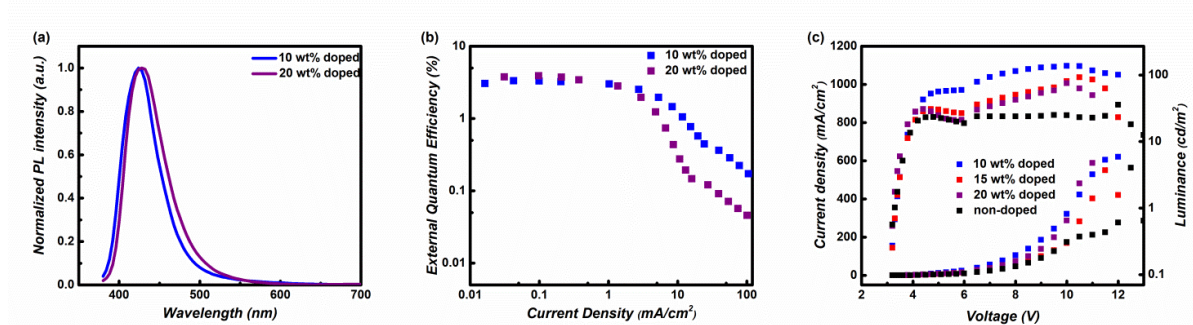

**Figure S3.** (a) The OLED EL spectra of N-TBPMCNC device (10 wt% doped and 20 wt% doped); (b) the figure of EQE in different current densities (10 wt% doped and 20 wt% doped); (c) the current density-voltage-luminance (J-V-L) characteristic for 10 wt% doped and 20 wt% doped devices.

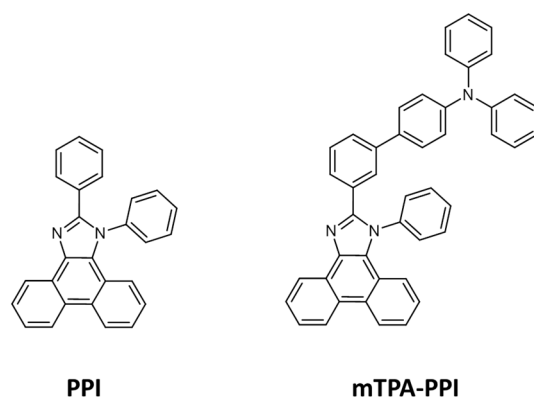

**Figure S4.** The structure of PPI and mTPA-PPI.

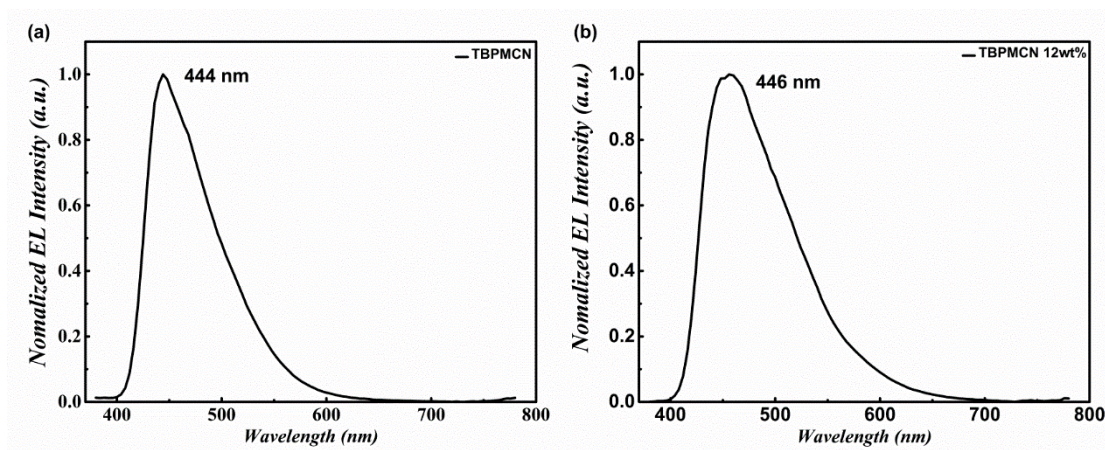

**Figure S5.** (a) The TBPMCNC EL spectra of non-doped device; (b) the TBPMCNC EL spectra of 12 wt% doped device.



5

## S-II Tables

**Table S1.** The specific energy value of singlet and triplet for N-TBPMCNC and TBPMCNC calculated by density functional theory (DFT) method at a M062X/6-31g (d, p).

| N-TBPMCNC (eV)  |        |                 |        | N-TBPMCNC (eV)  |        |                 |        |
|-----------------|--------|-----------------|--------|-----------------|--------|-----------------|--------|
| S <sub>1</sub>  | 3.9775 | T <sub>1</sub>  | 3.1218 | S <sub>1</sub>  | 3.8019 | T <sub>1</sub>  | 3.1218 |
| S <sub>2</sub>  | 4.0195 | T <sub>2</sub>  | 3.2242 | S <sub>2</sub>  | 3.9945 | T <sub>2</sub>  | 3.3271 |
| S <sub>3</sub>  | 4.3269 | T <sub>3</sub>  | 3.5819 | S <sub>3</sub>  | 4.2326 | T <sub>3</sub>  | 3.6657 |
| S <sub>4</sub>  | 4.3803 | T <sub>4</sub>  | 3.7009 | S <sub>4</sub>  | 4.3805 | T <sub>4</sub>  | 3.7283 |
| S <sub>5</sub>  | 4.569  | T <sub>5</sub>  | 3.9007 | S <sub>5</sub>  | 4.4296 | T <sub>5</sub>  | 3.7723 |
| S <sub>6</sub>  | 4.6401 | T <sub>6</sub>  | 3.9313 | S <sub>6</sub>  | 4.5396 | T <sub>6</sub>  | 3.8656 |
| S <sub>7</sub>  | 4.669  | T <sub>7</sub>  | 3.9666 | S <sub>7</sub>  | 4.558  | T <sub>7</sub>  | 3.9284 |
| S <sub>8</sub>  | 4.7193 | T <sub>8</sub>  | 4.0494 | S <sub>8</sub>  | 4.6657 | T <sub>8</sub>  | 3.9825 |
| S <sub>9</sub>  | 4.8828 | T <sub>9</sub>  | 4.221  | S <sub>9</sub>  | 4.801  | T <sub>9</sub>  | 4.1304 |
| S <sub>10</sub> | 4.9666 | T <sub>10</sub> | 4.3136 | S <sub>10</sub> | 4.8451 | T <sub>10</sub> | 4.2123 |

**Table S2.** Absorption and emission peak positions of compounds in different solvents.

| Solvents          | $f(\epsilon, n)$ | N-TBPMCNC           |                     |                                     |
|-------------------|------------------|---------------------|---------------------|-------------------------------------|
|                   |                  | $\lambda_a$<br>(nm) | $\lambda_f$<br>(nm) | $\nu_a - \nu_f$ (cm <sup>-1</sup> ) |
| Hexane            | 0.0012           | 347                 | 403                 | 4004.54802                          |
| Triethylamine     | 0.048            | 347                 | 408                 | 4308.63988                          |
| Butylether        | 0.096            | 347                 | 412                 | 4546.59914                          |
| Isopropyl ether   | 0.145            | 347                 | 417                 | 4837.62846                          |
| Ether             | 0.167            | 347                 | 417                 | 4837.62846                          |
| Ethyl acetate     | 0.200            | 347                 | 426                 | 5344.2654                           |
| Tetrahydrofuran   | 0.210            | 347                 | 429                 | 5508.42049                          |
| Dichloromethane   | 0.217            | 347                 | 433                 | 5723.75558                          |
| Dimethylformamide | 0.276            | 347                 | 436                 | 5882.66399                          |
| Acetone           | 0.284            | 343                 | 435                 | 6166.0132                           |
| Acetonitrile      | 0.305            | 342                 | 436                 | 6303.98627                          |

\*The abbreviations:  $f$ : polarity factor of solvents;  $\epsilon$ : dielectric constant;  $\lambda_a$ : absorption wavelength;  $\lambda_f$ : emission wavelength;  $\nu_a$ : wave number of the absorption spectrum;  $\nu_f$ : wave number of the emission spectrum.

**Table S3.** PLQY of N-TBPMCNC in different solvents.

| Solvents | Hexane | Ether | THF | Acetonitrile |
|----------|--------|-------|-----|--------------|
| PLQY (%) | 55     | 73    | 14  | 1            |

## S-III Illustrations

### 3.1. General information

A Bruker AVANCE 500 spectrometer was used for the  $^1\text{H}$  NMR and  $^{13}\text{C}$  NMR measurement at 298 K. The deuterated dimethyl sulfoxide (d-DMSO) and deuterated chloroform (d- $\text{CHCl}_3$ ) as solvents and tetramethylsilane (TMS) as a standard were purchased from J&K Scientific. The Flash EA 1112, CHNS-O elemental analysis instrument was used to characterize these compounds. The differential scanning calorimetry (DSC, DSC Q100) PerkinElmer thermal analysis system was set at a heating rate of  $10\text{ }^\circ\text{C min}^{-1}$  and a nitrogen flow rate of  $80\text{ mL min}^{-1}$ . The thermogravimetric analysis (TGA, TA 2050) was set at a scanning rate of  $10\text{ }^\circ\text{C min}^{-1}$  in a nitrogen flow. The matrix-assisted laser desorption ionization time-of-flight mass spectrometry (MALDI-TOF MS) was operated on the AXIMA-CFRTM plus instrument. A BAS 100W Bioanalytical Systems was used to record cyclic voltammetry (CV). The glass carbon disk ( $\Phi = 3\text{ mm}$ ), platinum wire and  $\text{Ag}/\text{Ag}^+$  electrode were used as working electrode, auxiliary electrode and reference electrode, respectively. The calculation mainly relied on PowerLeader cluster instrument.

### 3.2. Lippert–Mataga model

The Lippert–Mataga model can describe the relationship between excited state dipole moment and the solution polarity. Based on the related dipole moment of the solvent, the dipole moment of the excited state can be calculated according to the following equation:

$$hc(\nu_a - \nu_f) = hc(\nu_a^0 - \nu_f^0) - \frac{2(\mu_e - \mu_g)^2}{a^3} f(\epsilon, n) \quad (1)$$

the  $f$  is the orientational polarizability of solvents,  $\mu_e$  is the dipole moment of excited state,  $\mu_g$  is the dipole moment of ground state;  $a$  is the solvent cavity (Onsager) radius,  $\epsilon$  and  $n$  are the solvent dielectric and the solvent refractive index, respectively.

### 3.3. Relative PLQY measurement

The PLQY in solution is with a 0.1 mol/L quinine sulfate aqueous solution for reference. The PLQY of quinine sulfate aqueous solution is 0.546, and the PLQY of the sample can be calculated by the following equation:

$$\text{QY}_s = 0.546 \cdot \frac{I_s}{I_q} \cdot \frac{A_q}{A_s} \quad (2)$$

the  $\text{QY}_s$  is the relative quantum yield, the  $I_s$  and  $I_q$  are the area of sample and quinine sulfate aqueous solution emission spectrum, and the  $A_s$  and  $A_q$  are the absorbance of sample and quinine sulfate aqueous solution at 365 nm.
